# Supplementary figures and images for: Eco-conscious chromatographic determination of an anti-depressant free-dose combination in the presence of related impurities
Source: Royal Society of Chemistry journal article supplement (doi:10.1039/d5ay00168d), 2025-01-01

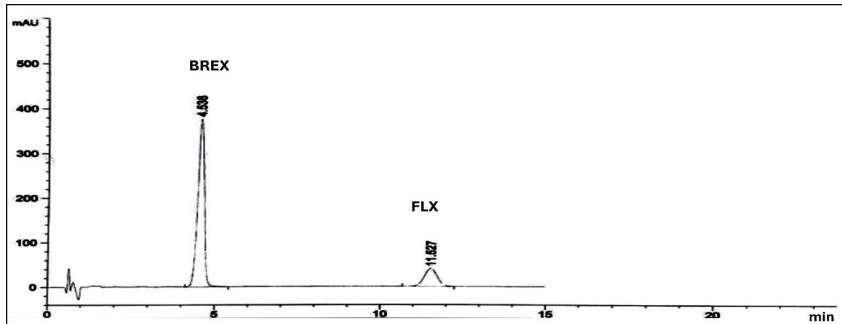

Supplement: d5ay00168d2.pdf [file d5ay00168d2.pdf]
